# Supplementary material for: Halide redistribution in Pd-catalysed 1,6-diene cycloisomerisation
Source: Royal Society of Chemistry journal article supplement (doi:10.1039/b009356o), 2001-01-01
Supplement: b009356o.doc [file b009356o.doc]

**Material to be published as Electronic Supplementary Information (ESI)**

**General procedures**

**Analytical** (for data obtained in Table):Separate solutions of **1a** (20.1mg, 0.095mmol, in 1.5 cm3) and the catalysts (5 mol%, in 0.5 cm3) in the appropriate solvent were equilibrated at the desired temperature for 15 minutes. The catalyst solution was then transferred to the solution of **1a** *via* cannula and the reaction stirred for the time indicated. Samples (0.1 cm3) were withdrawn periodically *via* syringe, passed through a small plug of silica (1cm), the plug washed with CH2Cl2 (2 cm3) and the sample stored at -20 °C prior to analysis by GC. *Solvents*: Chloroform (BDH) was filtered through a column of neutral alumina and then distilled from P2O5. Anhydrous CH2Cl2 (Fluka) and dichloroethane (Acros) were used as received. *GC Analysis* was performed on a Shimadzu GC17A fitted with a Restek Corp. RTX® – 5 Column, Crossbond® 5% diphenyl – 95% dimethyl polysiloxane stationary phase (15m, 0.25mm, 0.25mm df). Conditions: injector, 220 °C; detector, 220 °C; oven, 100 °C; total flow, 0.4 cm3/min; pressure, 100 kPa. See accompanying typical GC analyses from a run (Table, entry 10) giving 29 / 1 selectivity for **3a**.


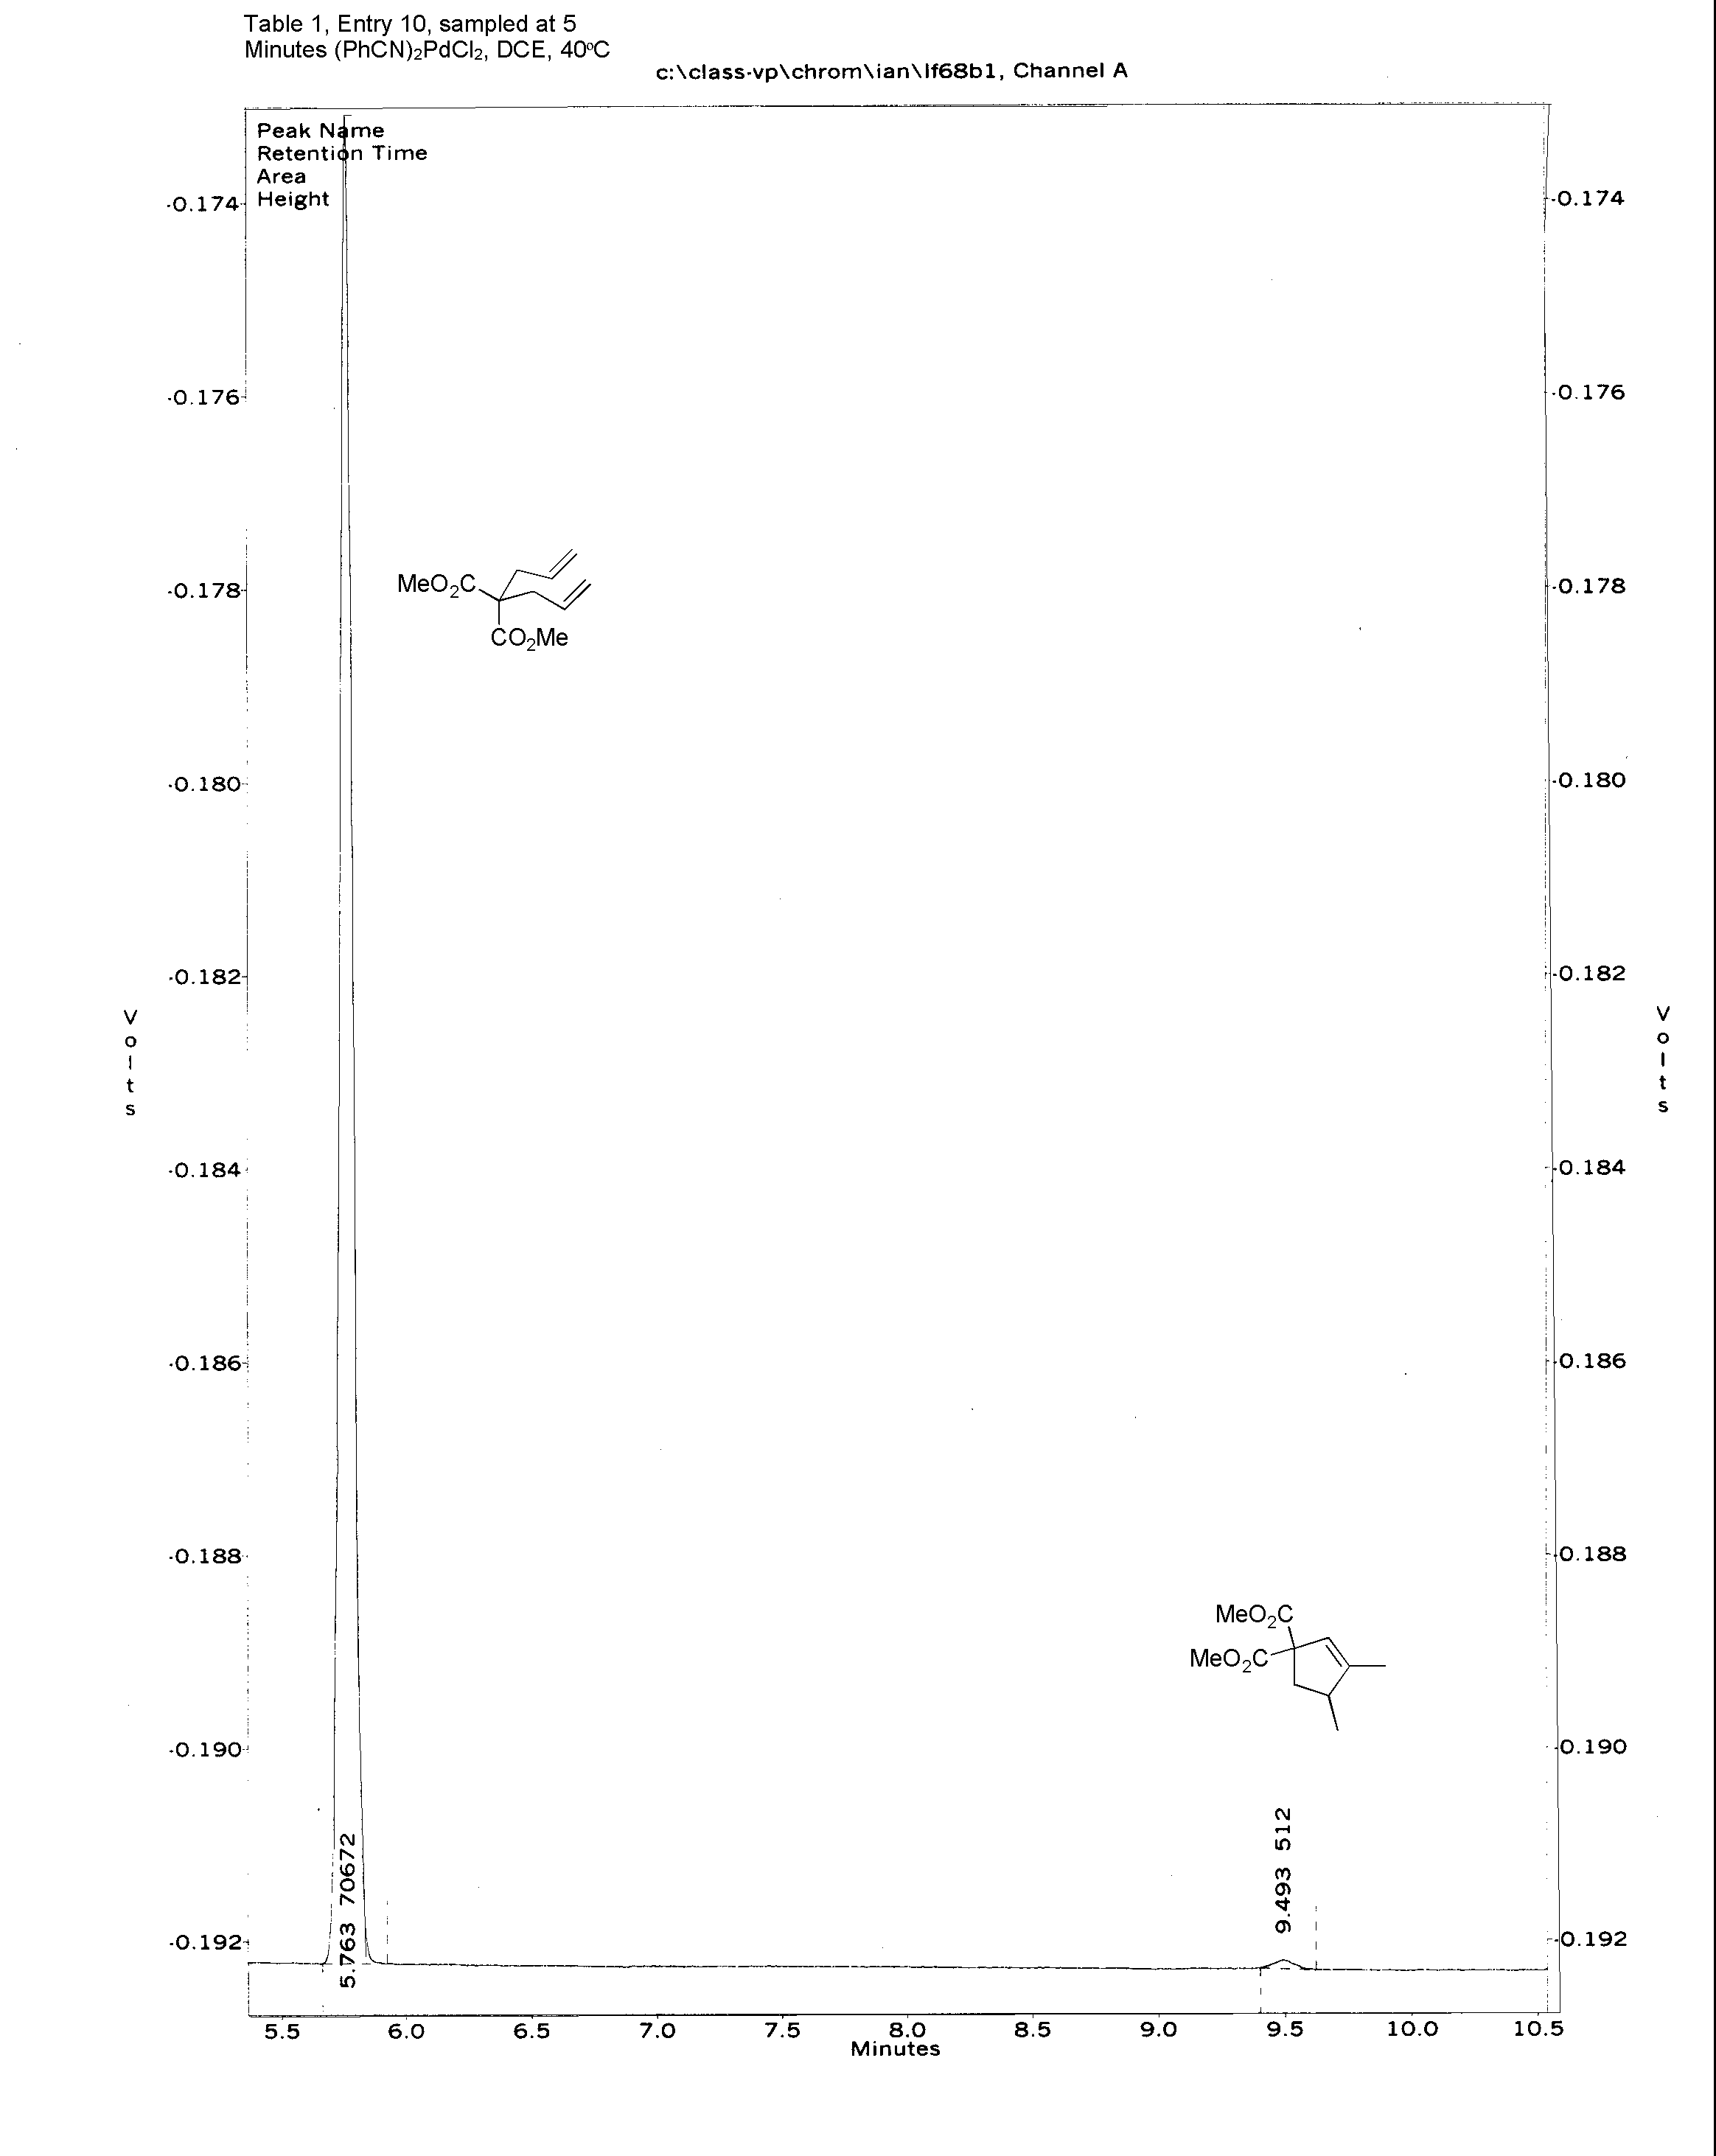


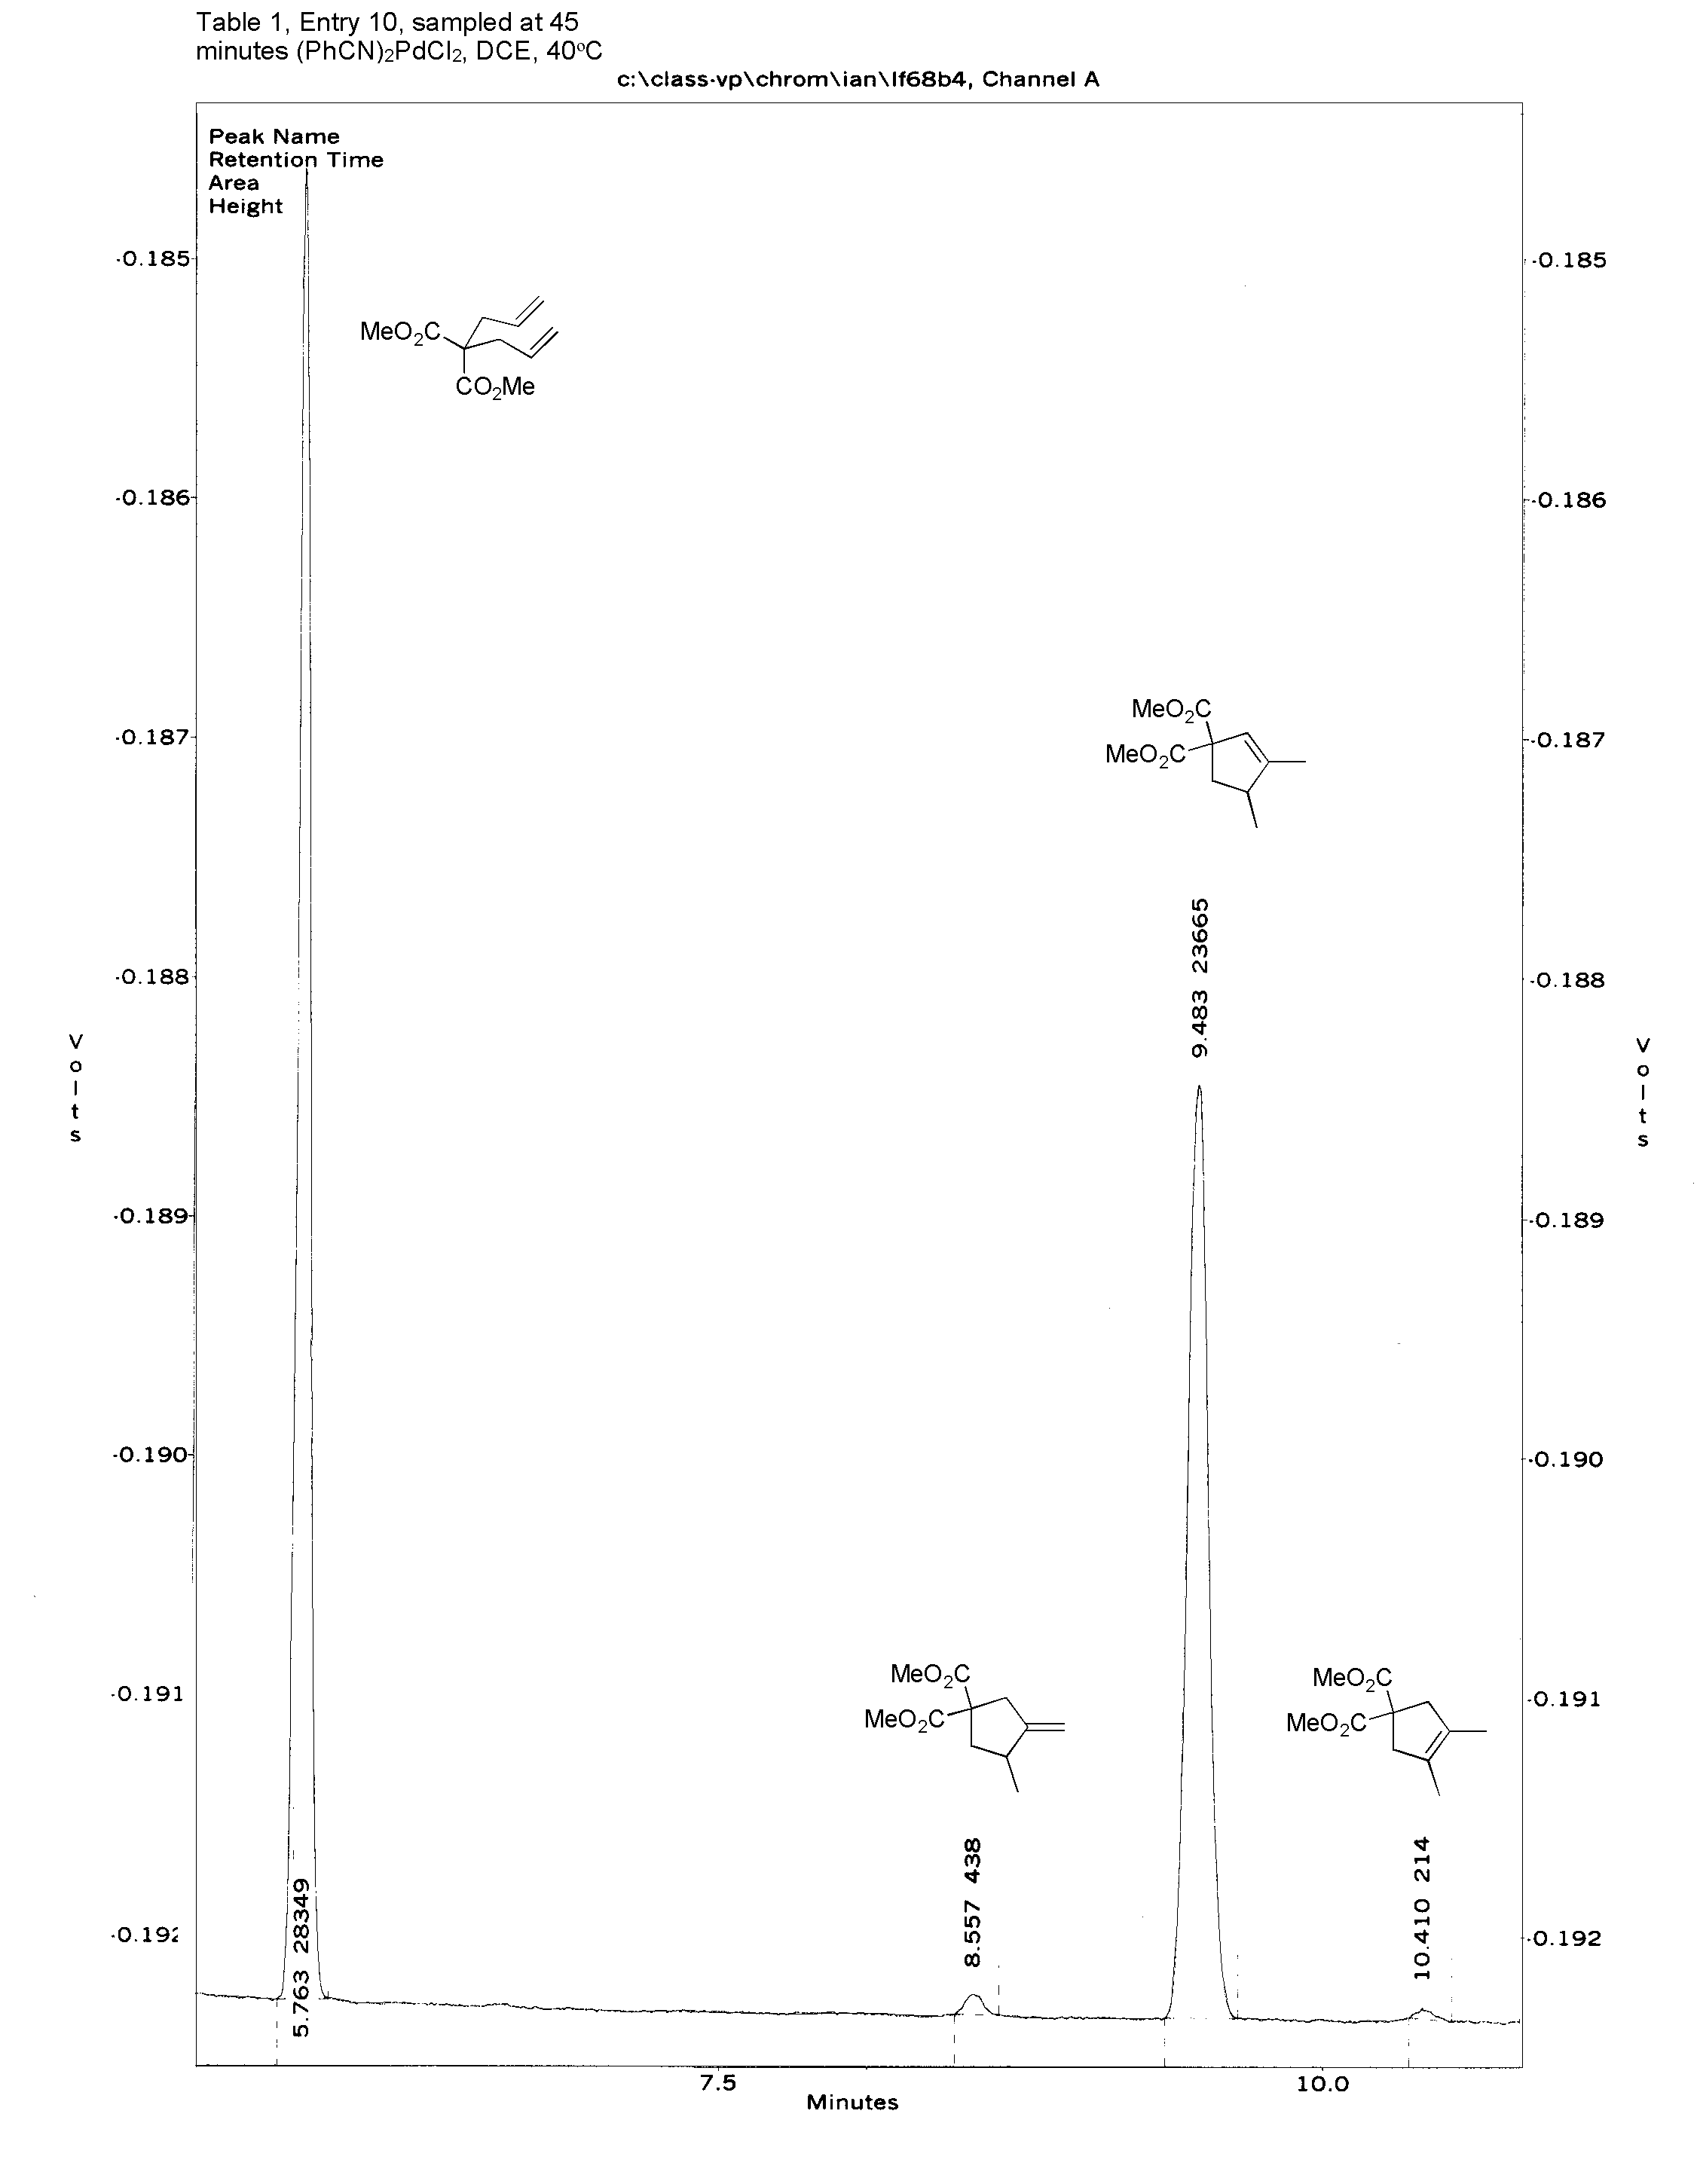


**
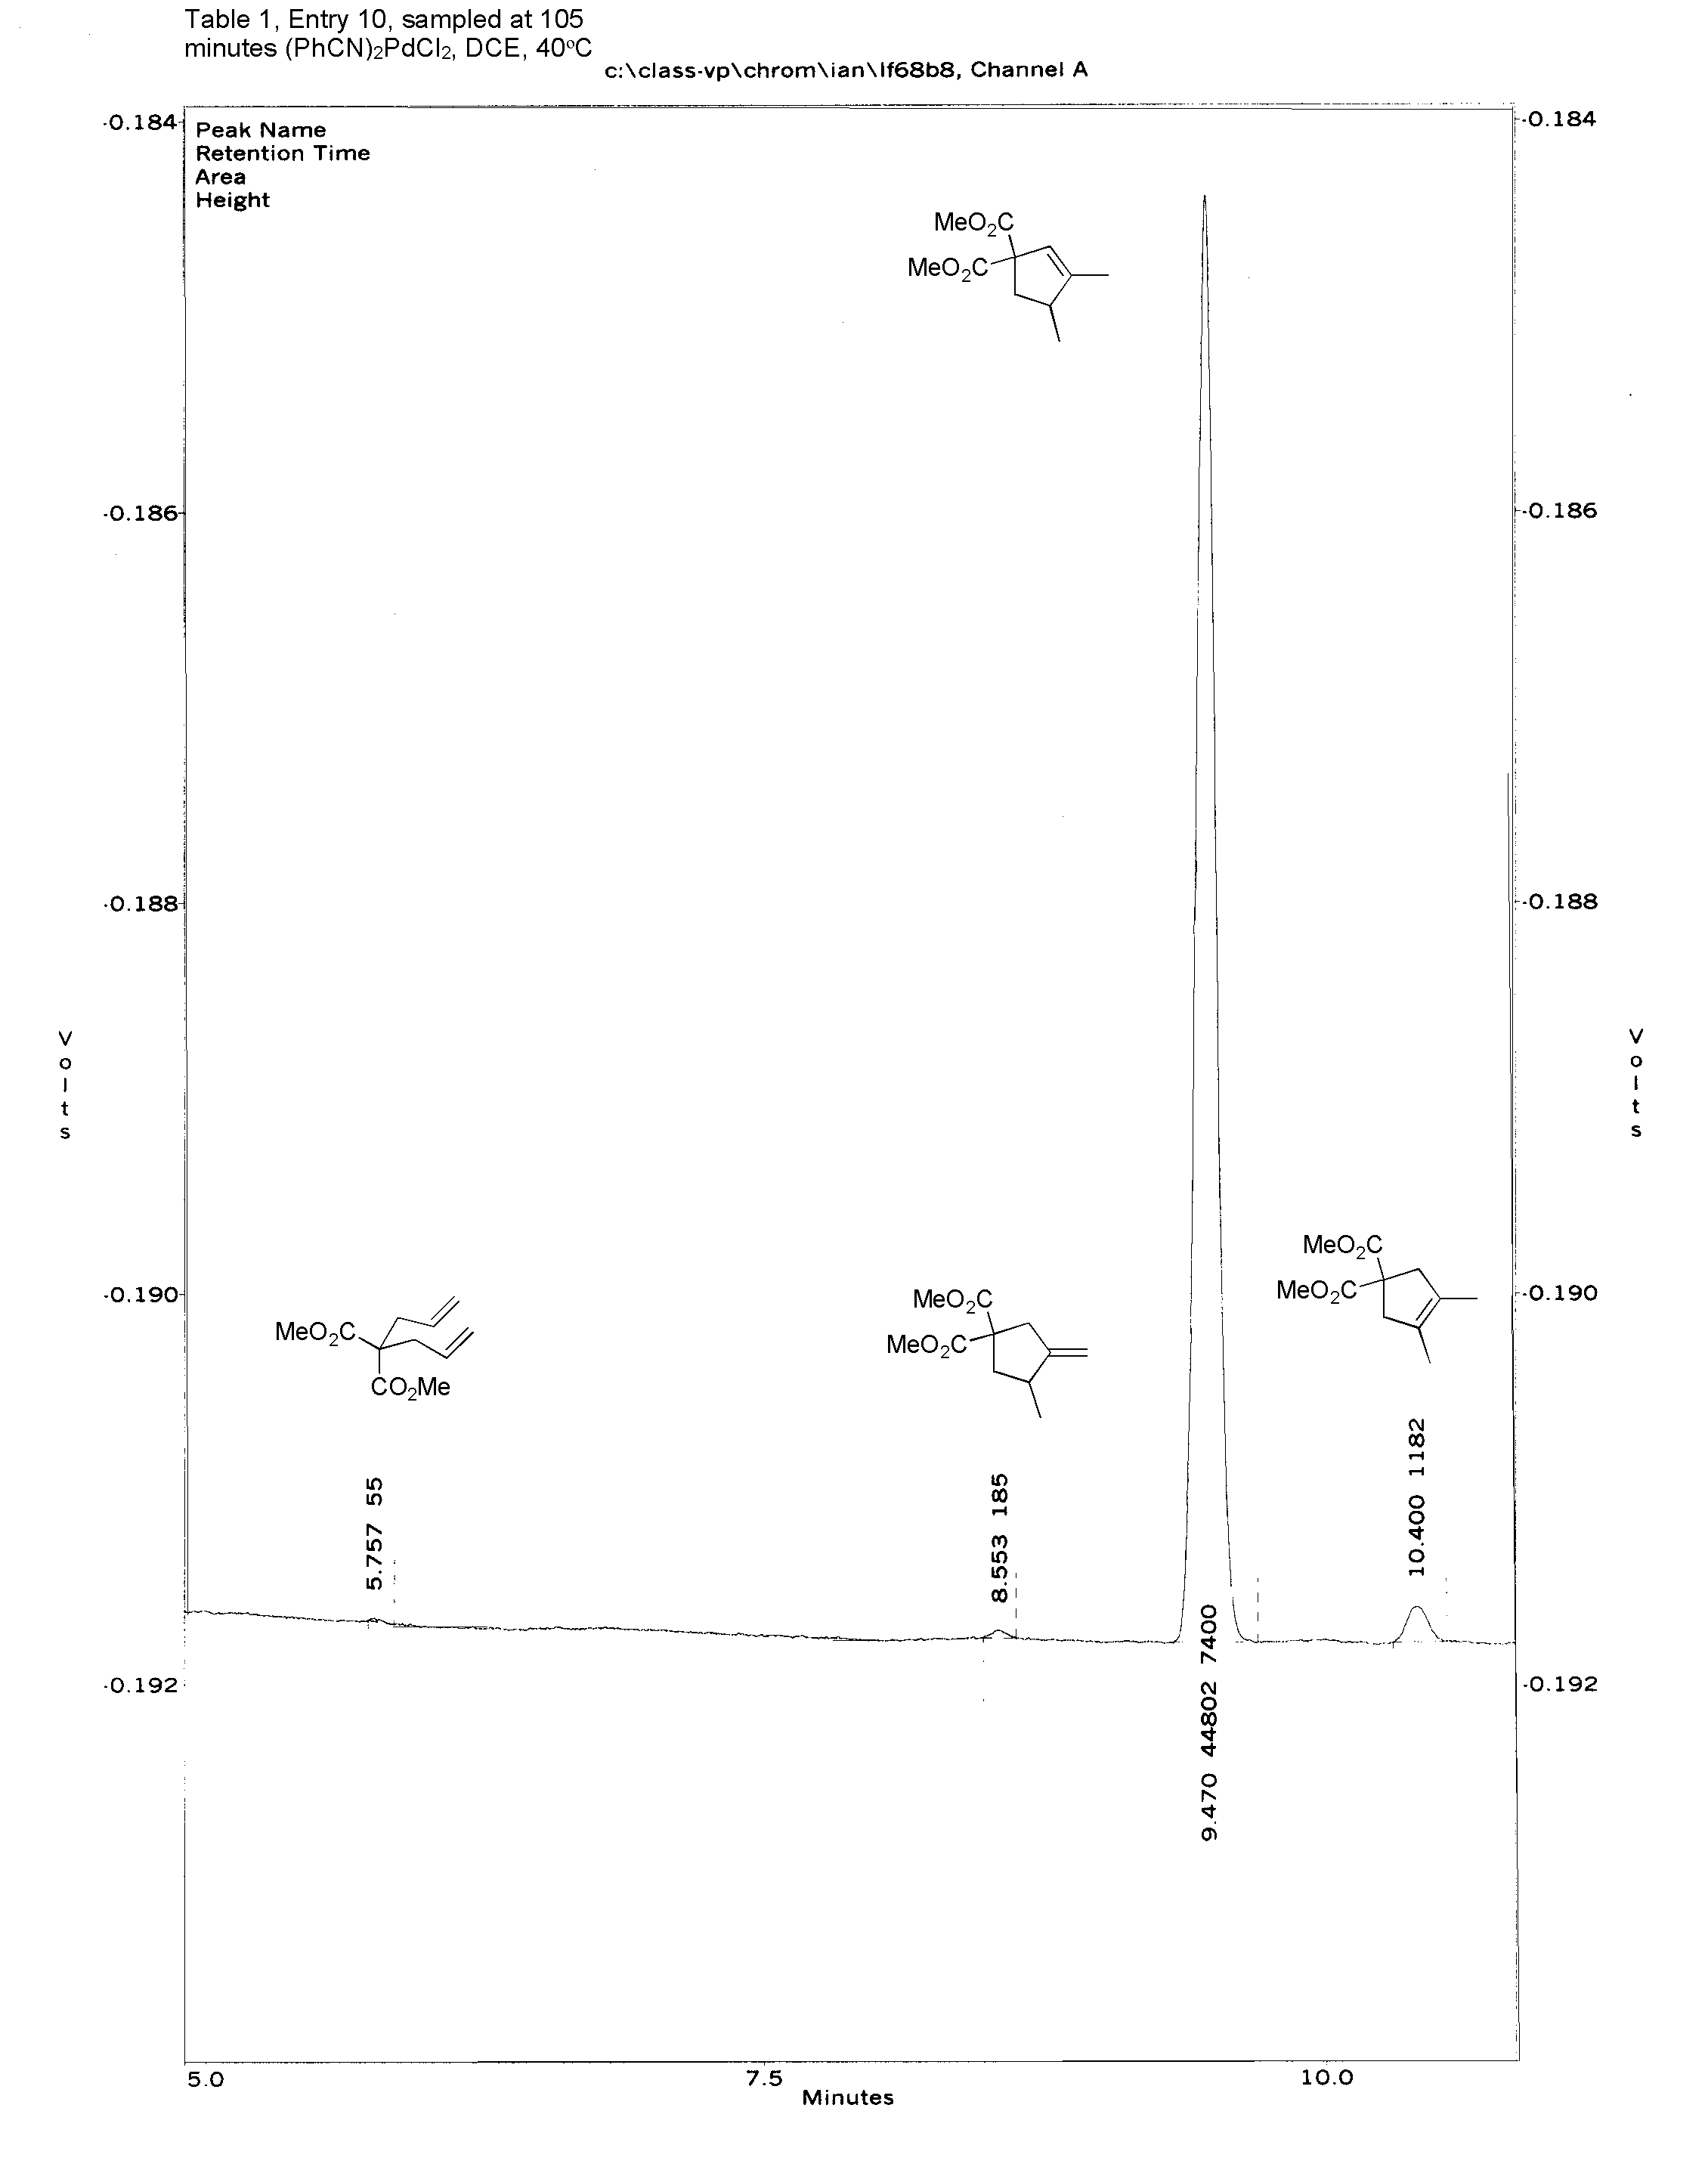
**

**Preparative**: A solution of **1a** (0.256 g, 1.2mmol) in dry CHCl3 (25 cm3) was stirred at 40 °C for 15 minutes before addition of a solution of [(*t*-BuCN)2PdCl2] (20.7mg, 0.06mmol, 5 mol %) in CHCl3 (5 cm3) at 40oC *via* cannula. The mixture was strirred at 40 °C for 3 hours and then quenched by the addition of silica-gel (1g) and diethyl ether (60 cm3). After filtration through a pad of Celite, the filtrate was concentrated *in vacuo*. Purification by flash chromatography using hexane-ethyl acetate (12:1, v/v) gave the product as a clear oil (0.240 g, 96 %). H (400 MHz, CDCl3) 1.06 (3H, d, 3*J* 12.7, C*H*3CH), 1.73 (3H, m, C*H*3C=CH), 1.88-2.00 (1H, m, CH*H*CE2), 2.62-2.82 (2H, m, CH3C*H*), 3.71 and 3.74 (6H, 2 x s, 2 x CO2C*H*3), 5.43 (1H, br s, C=C*H*). C (75.45 MHz: CDCl3) 14.6 (*C*H3C=), 18.9 (*C*H3CH), 40.6 (CH2), 41.9 (*C*HCH3), 52.4 and 52.6 (2 x CO2*C*H3), 64.8 (*C*(CO2Me)2), 121.8 (*C*H=C), 150.3 (CH=*C*CH3), 172.0 and 172.5 (2 x *C*O2Me).

**Table** Regioselectivities and reaction times for cycloisomerisation of 1,6-diene **1a** by 5 mol % [L2PdCl2] in different solvents at different temperatures.


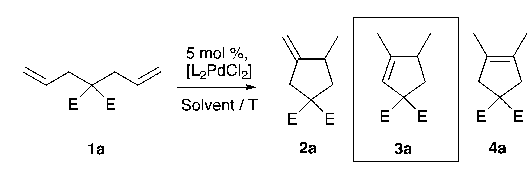


Entry La Solvent Temp Timeb Selectivityc

/ °C / h **3a** / **2a** + **4a**

1 MeCN CHCl3 60 ≤ 0.1 > 20 / 1d

2 MeCN CHCl3 40 0.6 20 / 1

3 MeCN DCE 40 2 37 / 1

4 MeCN CH2Cl2 40 6 19 / 1

5 MeCN CHCl3 23 4 7 / 1

6 MeCN DCE 40 2 37 / 1

7 MeCN DCE 23 4 36 / 1

8 PhCN CHCl3 40 3 76 / 1

9 PhCN CHCl3 23 28 62 / 1

10 PhCN DCE 40 2 29 / 1

11 PhCN DCE 23 2.8 52 / 1

12 *t*-BuCN CHCl3 60 0.15 36 / 1

13 *t*-BuCN CHCl3 40 1.5 39 / 1

14 *t*-BuCN CHCl3 23 4 36 / 1

15 *t*-BuCN DCE 40 1.5 33 / 1

16 *t*-BuCN DCE 23 4 39 / 1

17 DMSO DCE 40 42e 110 / 1

18 DMSOf DCE 40 22g 99 / 1

_______________________________________________________________________

a) L = ligand in [L2PdCl2]. All reactions were conducted with [**1a**]0 = 0.045 M (± 0.002) and 5 mol % pro-catalyst. b) point at which GC analysis indicated > 99 % conversion of **1a**. c) selectivity for the trisubstituted alkene isomer **3a** relative to **2a** and **4a** (estimated by GC analysis, without correction factors). No other products above 0.5 % were evident by GC analysis - in most cases this threshold value was below 0.2 %. d) selectivity after 30 mins > 20 / 1; after 6 hrs, 1.7 / 1. e) 69 % conversion. f) The -halide dimer, [(DMSO)2Pd2(-Cl2)Cl2], was employed. g) 90 % conversion.
